# Supplementary material for: One-pot synthesis of cobalt complexes with 2,6-bis(arylimino)phenoxyl/phenthioxyl ligands and catalysis on isoprene polymerization
Source: Royal Society of Chemistry journal article supplement (doi:10.1039/d1dt00371b), 2021-01-01
Supplement: d1dt00371b1.pdf [file d1dt00371b1.pdf]

*Supporting Information*

**One-pot Synthesis of Cobalt Complexes with 2,6-Bis(arylimino)phenoxy/phenthioxy Ligands and Catalysis on Isoprene Polymerization**

*Xue-Meng Chen, Li-Cheng Huang, and Wei Gao*

College of Chemistry, Jilin University, Changchun 130012, China.

**S**Table 1. Summary of crystallographic data for complexes **1b'**, **3b'**, **4a**, and **4b**.

**S**Figure 1. <sup>1</sup>H NMR spectrum of <sup>Me</sup>S-CH<sub>3</sub>

**S**Figure 2. <sup>1</sup>H NMR spectrum of <sup>iPr</sup>S-CH<sub>3</sub>

**S**Figure 3. Molecular structure of **5b**

**S**Table 1. Summary of crystallographic data for complexes **1b'**, **3b'**, **4a**, and **4b**.

|                                                 | <b>1b'</b>                                                         | <b>3b'</b>                                                                                                    | <b>4a</b>                                                                                         | <b>4b</b>                                                                                       |
|-------------------------------------------------|--------------------------------------------------------------------|---------------------------------------------------------------------------------------------------------------|---------------------------------------------------------------------------------------------------|-------------------------------------------------------------------------------------------------|
| Formula                                         | C <sub>39</sub> H <sub>48</sub> Cl <sub>2</sub> CoN <sub>2</sub> O | C <sub>64</sub> H <sub>80</sub> Cl <sub>4</sub> Co <sub>2</sub> Li <sub>2</sub> N <sub>4</sub> O <sub>2</sub> | C <sub>34</sub> H <sub>43</sub> Cl <sub>4</sub> Co <sub>2</sub> LiN <sub>2</sub> O <sub>3.5</sub> | C <sub>48</sub> H <sub>70</sub> Cl <sub>4</sub> Co <sub>2</sub> LiN <sub>2</sub> O <sub>5</sub> |
| <i>F</i> <sub>w</sub>                           | 690.62                                                             | 1210.86                                                                                                       | 802.30                                                                                            | 1021.66                                                                                         |
| cryst syst                                      | Monoclinic                                                         | Triclinic                                                                                                     | Monoclinic                                                                                        | Monoclinic                                                                                      |
| space group                                     | P2(1)/c                                                            | P-1                                                                                                           | P2(1)/n                                                                                           | P2(1)/c                                                                                         |
| <i>a</i> (Å)                                    | 14.2116(7)                                                         | 10.7411(7)                                                                                                    | 18.5708(10)                                                                                       | 16.092(5)                                                                                       |
| <i>b</i> (Å)                                    | 15.6053(8)                                                         | 11.4789(7)                                                                                                    | 23.5866(12)                                                                                       | 17.586(2)                                                                                       |
| <i>c</i> (Å)                                    | 18.0770(10)                                                        | 13.3274(8)                                                                                                    | 20.4402(11)                                                                                       | 19.569(6)                                                                                       |
| <i>α</i> (deg)                                  | 90                                                                 | 80.2670(10)                                                                                                   | 90                                                                                                | 90                                                                                              |
| <i>β</i> (deg)                                  | 111.560(2)                                                         | 77.5960(10)                                                                                                   | 108.7030(10)                                                                                      | 108.843(4)                                                                                      |
| <i>γ</i> (deg)                                  | 90                                                                 | 88.4920(10)                                                                                                   | 90                                                                                                | 90                                                                                              |
| <i>v</i> (Å <sup>3</sup> )                      | 3728.5(3)                                                          | 1581.67(17)                                                                                                   | 8480.5(8)                                                                                         | 5241(3)                                                                                         |
| <i>Z</i>                                        | 4                                                                  | 1                                                                                                             | 8                                                                                                 | 4                                                                                               |
| <i>D</i> <sub>calcd</sub> (gcm <sup>-3</sup> )  | 1.230                                                              | 1.271                                                                                                         | 1.257                                                                                             | 1.295                                                                                           |
| <i>μ</i> (mm <sup>-1</sup> )                    | 0.635                                                              | 0.738                                                                                                         | 1.066                                                                                             | 0.880                                                                                           |
| <i>F</i> (000)                                  | 1460.0                                                             | 636.0                                                                                                         | 3312                                                                                              | 2148                                                                                            |
| 2 <i>θ</i> <sub>max</sub> (deg)                 | 50.068                                                             | 52.044                                                                                                        | 46.098                                                                                            | 52.4                                                                                            |
| collected reflns                                | 35937                                                              | 8499                                                                                                          | 41708                                                                                             | 32019                                                                                           |
| Uniq reflns                                     | 6578                                                               | 6067                                                                                                          | 11840                                                                                             | 10327                                                                                           |
| <i>R</i> <sub>int</sub>                         | 0.0909                                                             | 0.0141                                                                                                        | 0.0776                                                                                            | 0.0864                                                                                          |
| GOF                                             | 1.063                                                              | 1.041                                                                                                         | 1.031                                                                                             | 1.038                                                                                           |
| <i>R</i> 1                                      | 0.0756                                                             | 0.0401                                                                                                        | 0.0824                                                                                            | 0.0758                                                                                          |
| <i>wR</i> 2                                     | 0.2031                                                             | 0.1125                                                                                                        | 0.2430                                                                                            | 0.2089                                                                                          |
| Largest diff peak,<br>hole (e Å <sup>-3</sup> ) | 1.32, -0.93                                                        | 0.83, -0.26                                                                                                   | 1.92, -0.54                                                                                       | 1.06, -0.90                                                                                     |

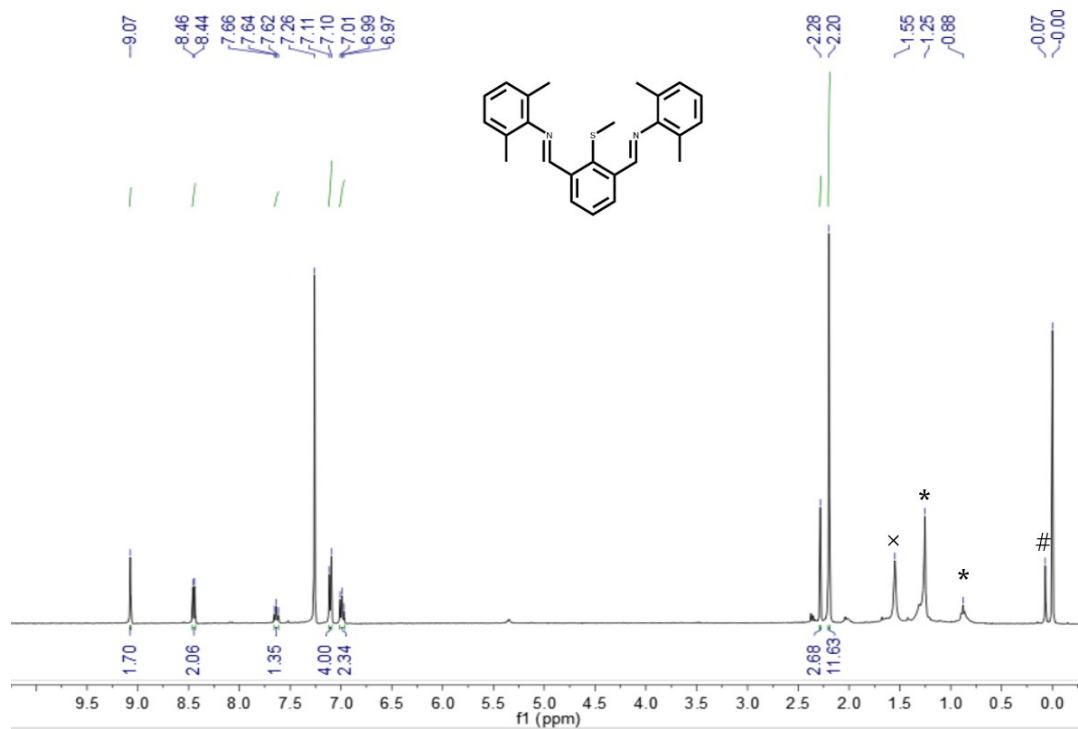

**Figure 1.** <sup>1</sup>H NMR spectrum of MeS-CH<sub>3</sub> (400 MHz, CDCl<sub>3</sub>, 25 °C). #, \*, and × stand for residual signals of silicone grease, n-hexane, and H<sub>2</sub>O respectively.

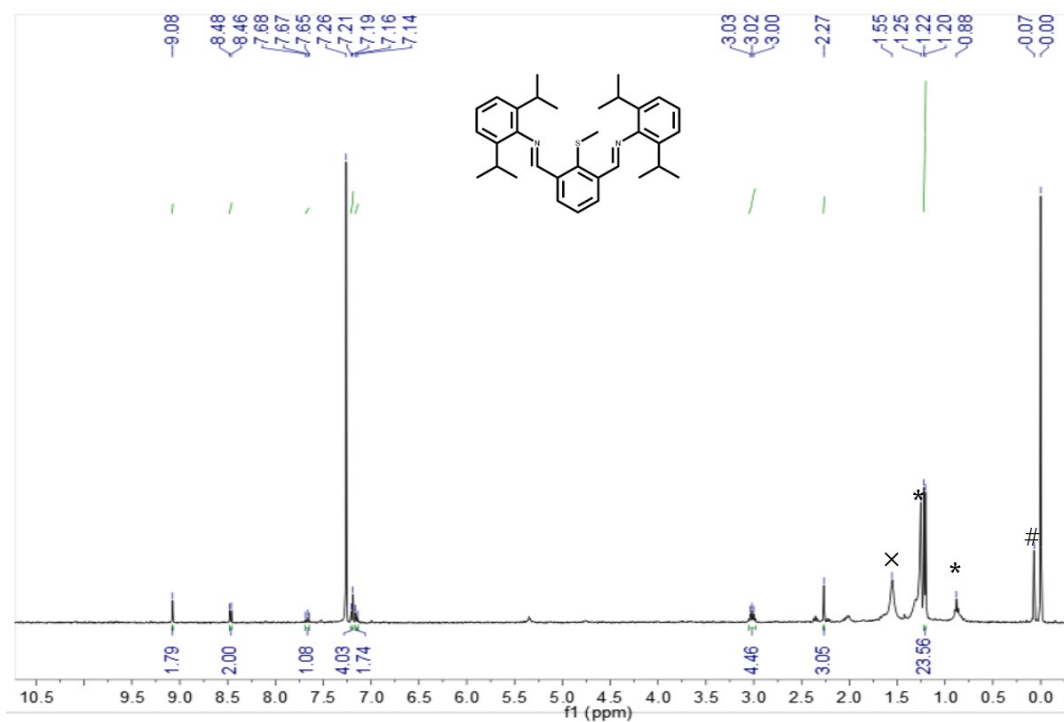

**Figure 2.** <sup>1</sup>H NMR spectrum of iPrS-CH<sub>3</sub> (400 MHz, CDCl<sub>3</sub>, 25 °C). #, \*, and × stand for residual signals of silicone grease, n-hexane, and H<sub>2</sub>O respectively.

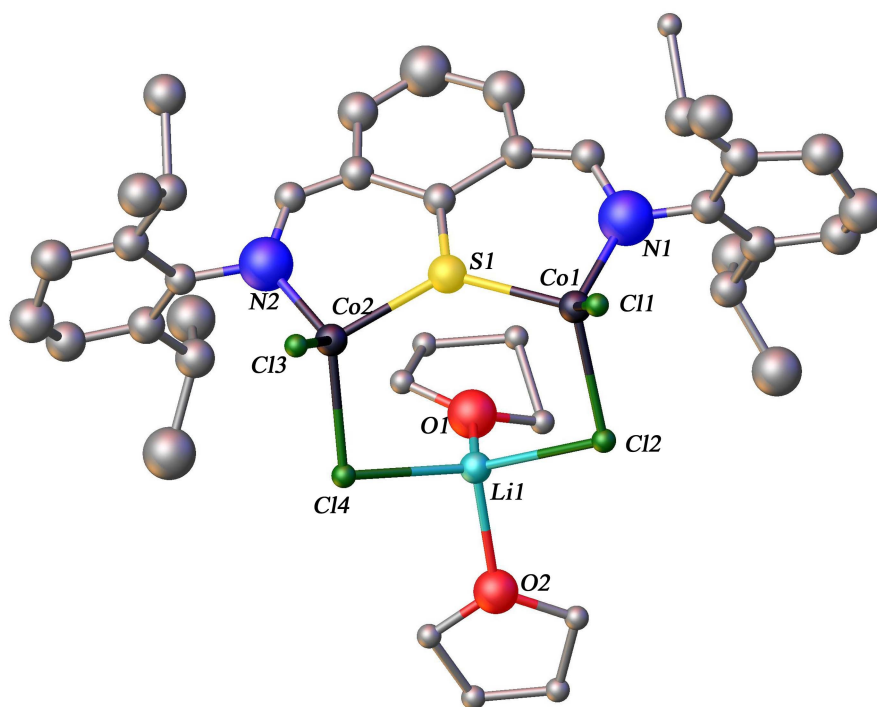

**Figure 3.** Molecular structure of **5b**
